# Supplementary material
Source: MDPI journal article supplement (https://www.mdpi.com/2297-8739/9/12/437)

**Target discover flavonoids from *Elymus nutans* Griseb using medium- and high- pressure liquid chromatography combined with online high-performance liquid chromatography–1,1-diphenyl-2-picrylhydrazyl detection**

## Table of Contents

|                                                                                               |                                     |
|-----------------------------------------------------------------------------------------------|-------------------------------------|
| Figure S1. ESI mass spectrum of salcolin A .....                                              | <b>Error! Bookmark not defined.</b> |
| Figure S2. $^1\text{H}$ NMR Spectrum (600 MHz) of salcolin A (in $\text{DMSO-}d_6$ ).....     | 4                                   |
| Figure S3. $^{13}\text{C}$ NMR Spectrum (151 MHz) of salcolin A (in $\text{DMSO-}d_6$ ). .... | 5                                   |
| Figure S4. ESI mass spectrum of tricin.....                                                   | 6                                   |
| Figure S5. $^1\text{H}$ NMR Spectrum (600 MHz) of tricin (in $\text{DMSO-}d_6$ ). ....        | 7                                   |
| Figure S6. $^{13}\text{C}$ NMR Spectrum (151 MHz) of tricin (in $\text{DMSO-}d_6$ ).....      | 8                                   |

**Figure S1.** ESI mass spectrum of salcolin A.

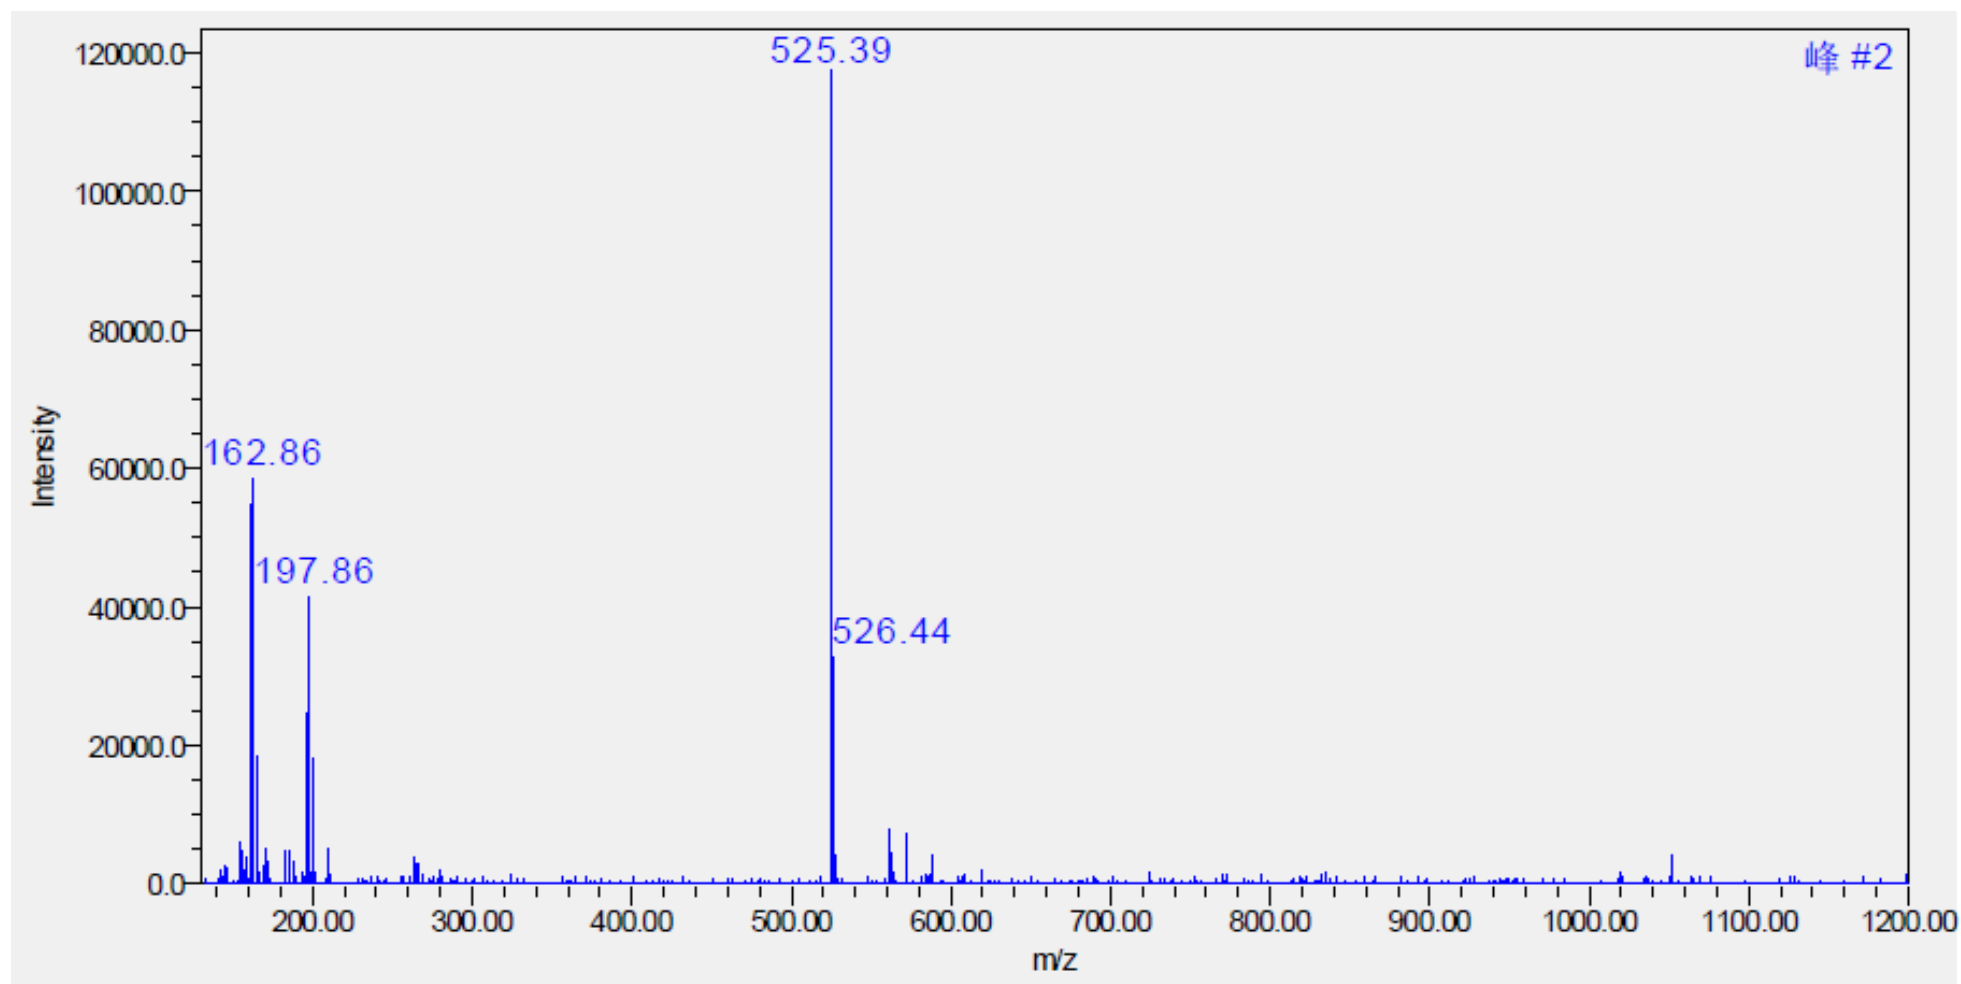

**Figure S2.**  $^1\text{H}$  NMR Spectrum (600 MHz) of salcolin A (in  $\text{DMSO}-d_6$ ).

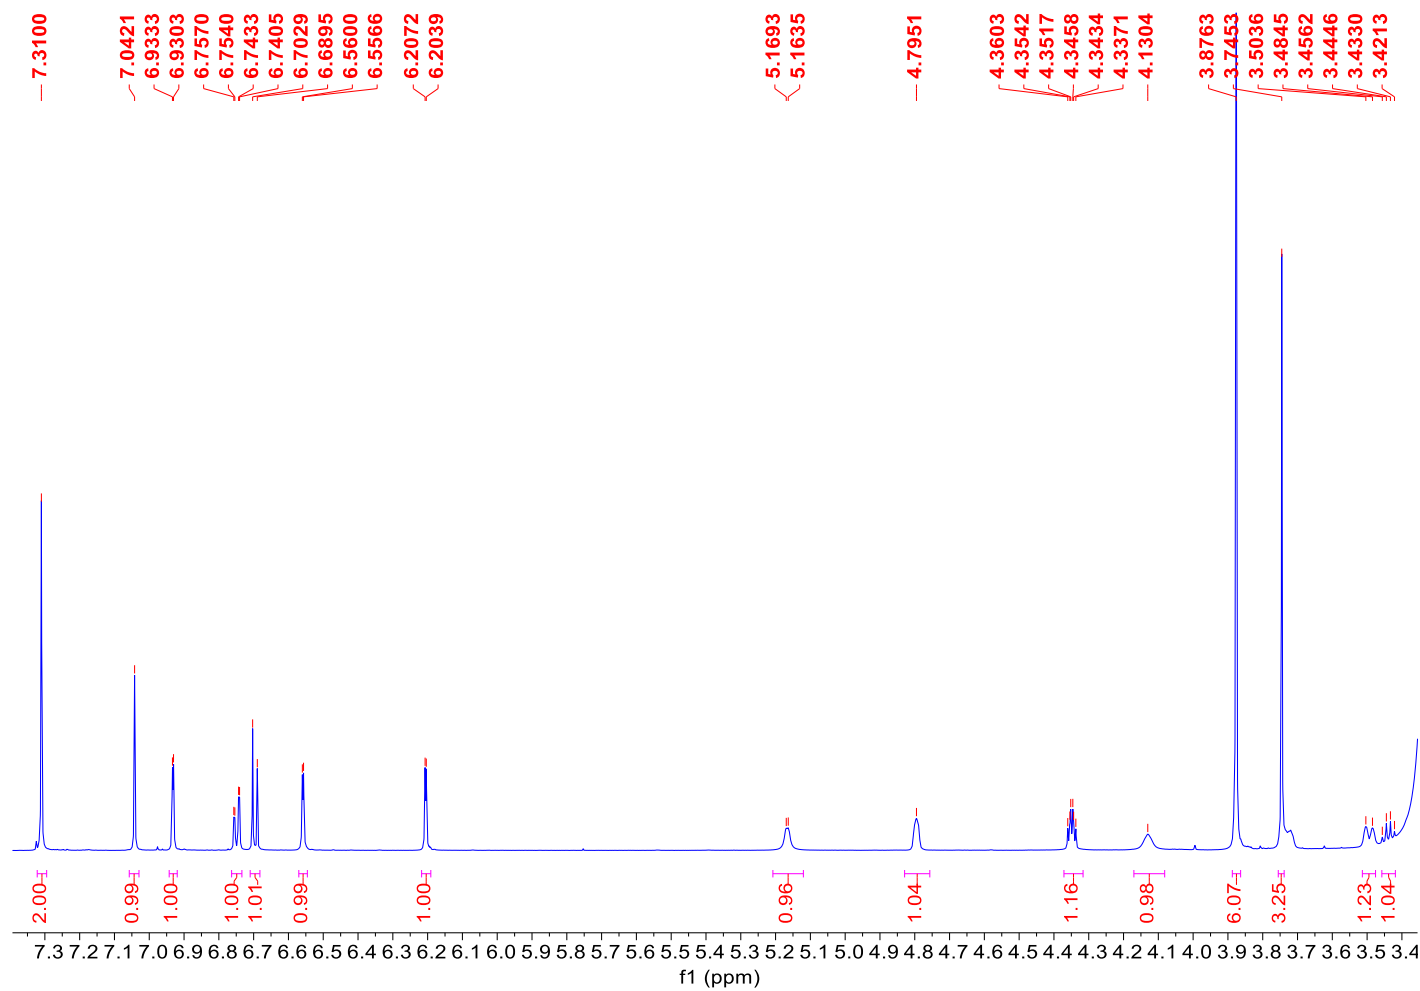

**Figure S3.**  $^{13}\text{C}$  NMR Spectrum (151 MHz) of salcolin A (in  $\text{DMSO-}d_6$ ).

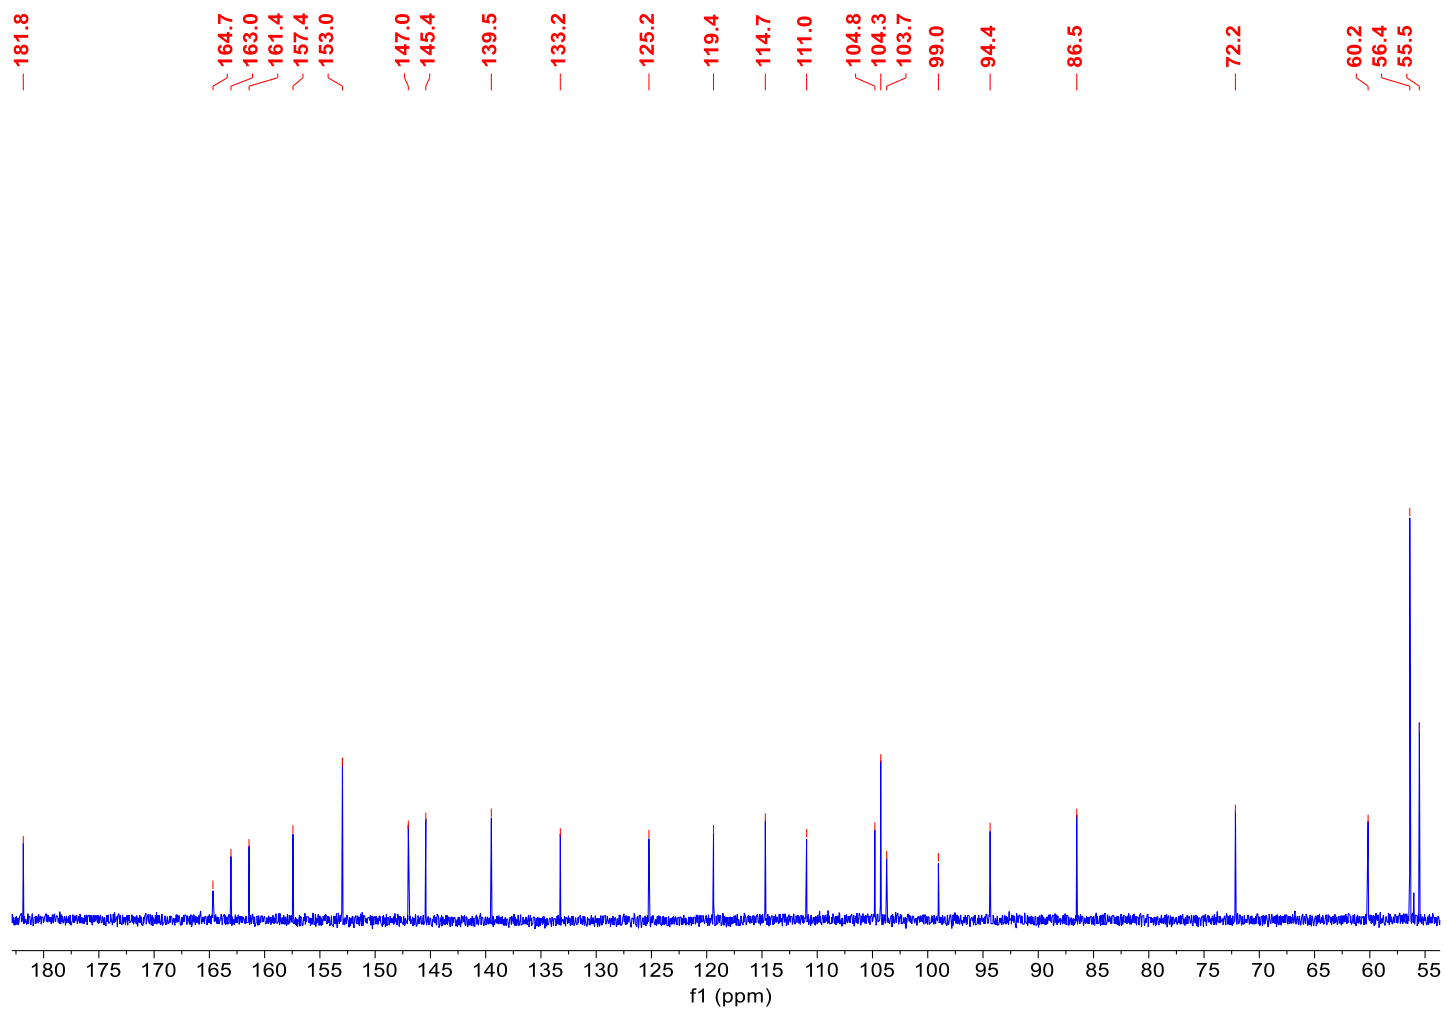

**Figure S4.** ESI mass spectrum of tricin.

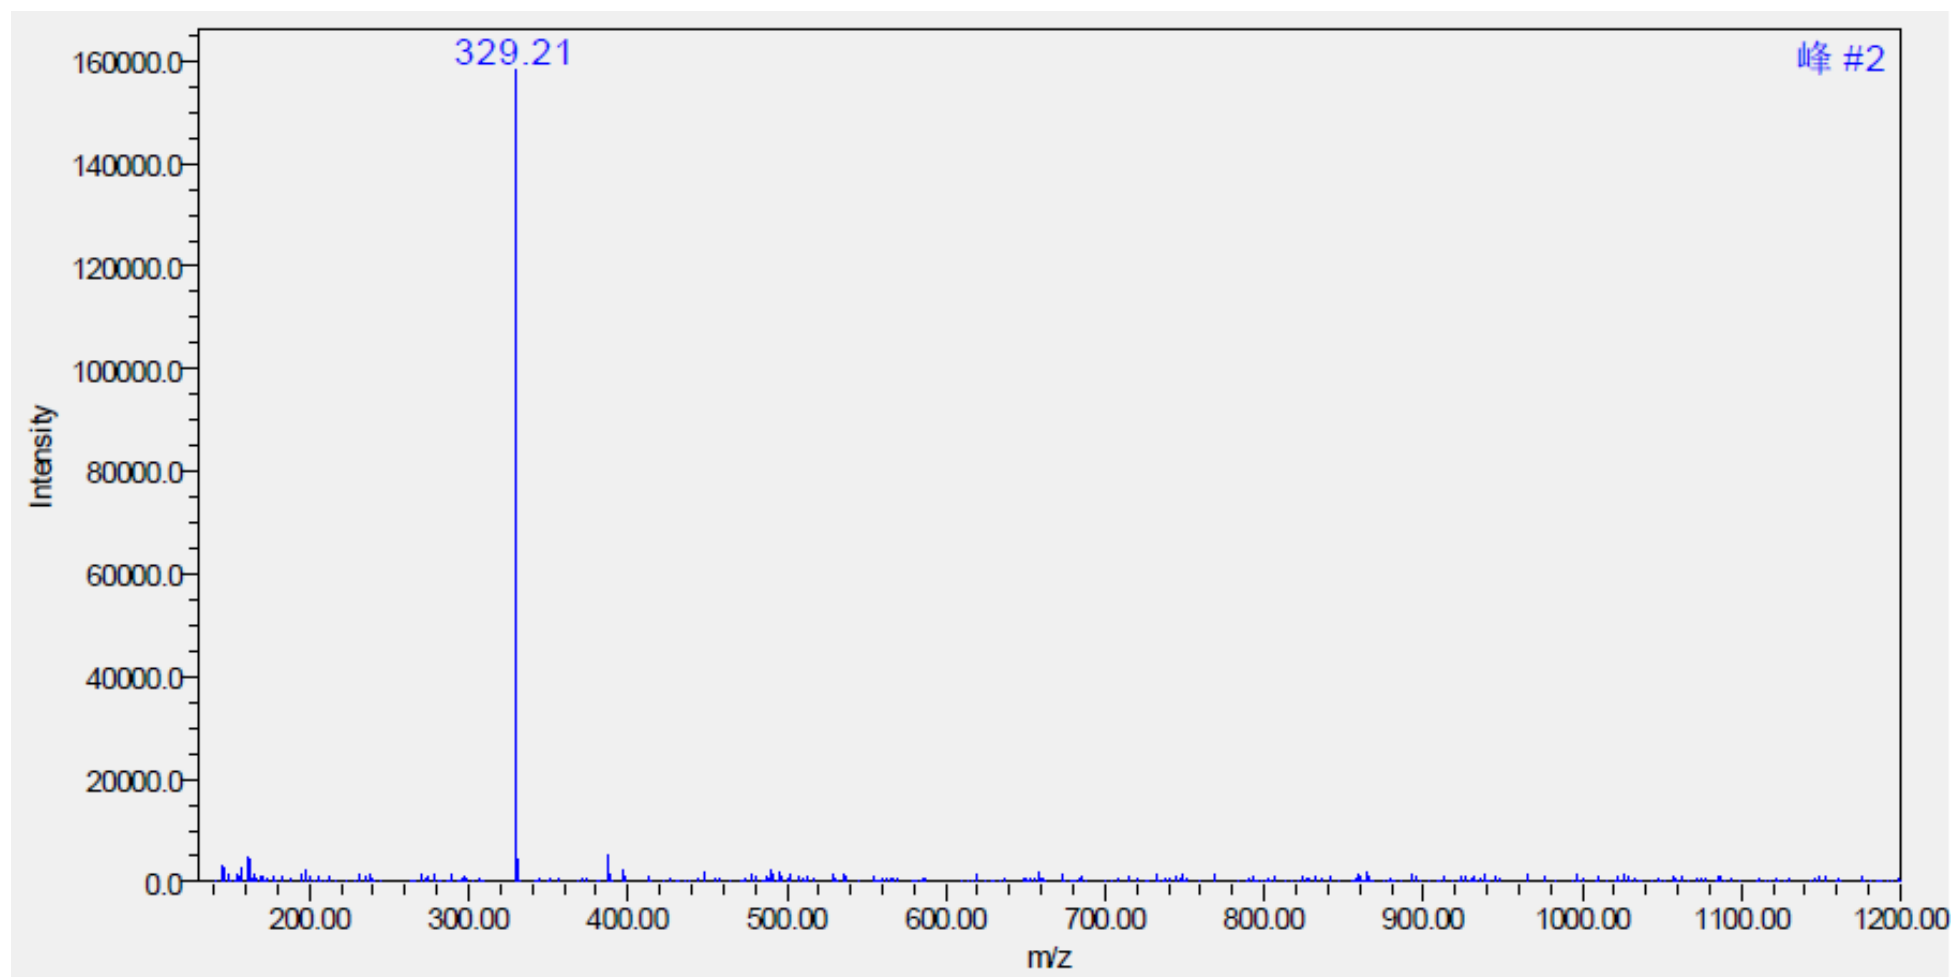

**Figure S5.**  $^1\text{H}$  NMR Spectrum (600 MHz) of tricin (DMSO- $d_6$ ).

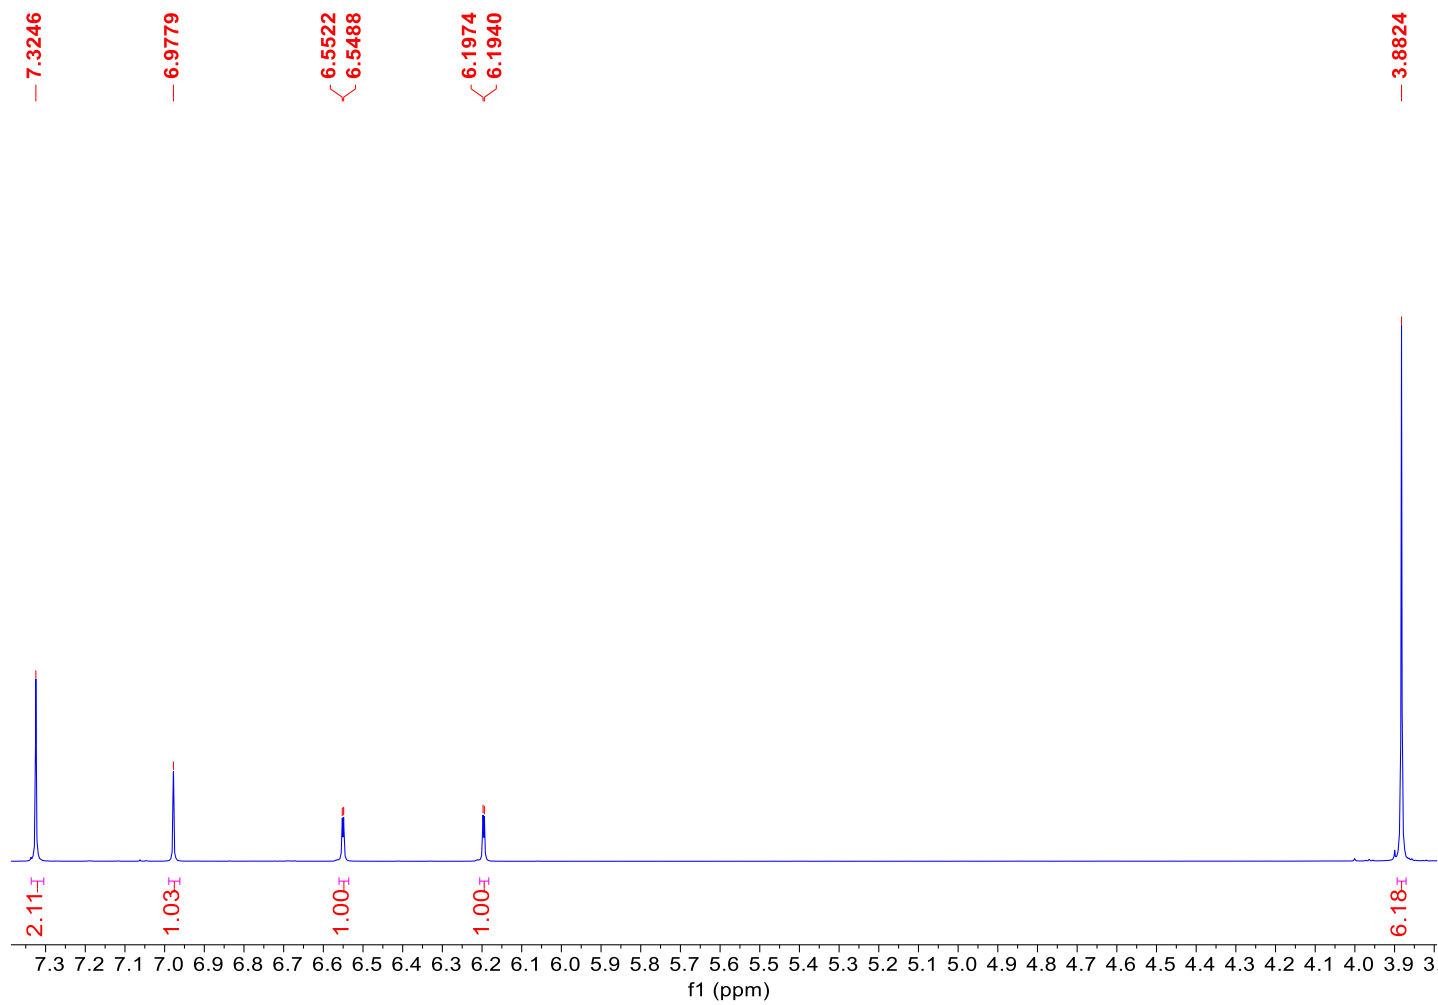

**Figure S6.**  $^{13}\text{C}$  NMR Spectrum (151 MHz) of triclin (in  $\text{DMSO-}d_6$ ).

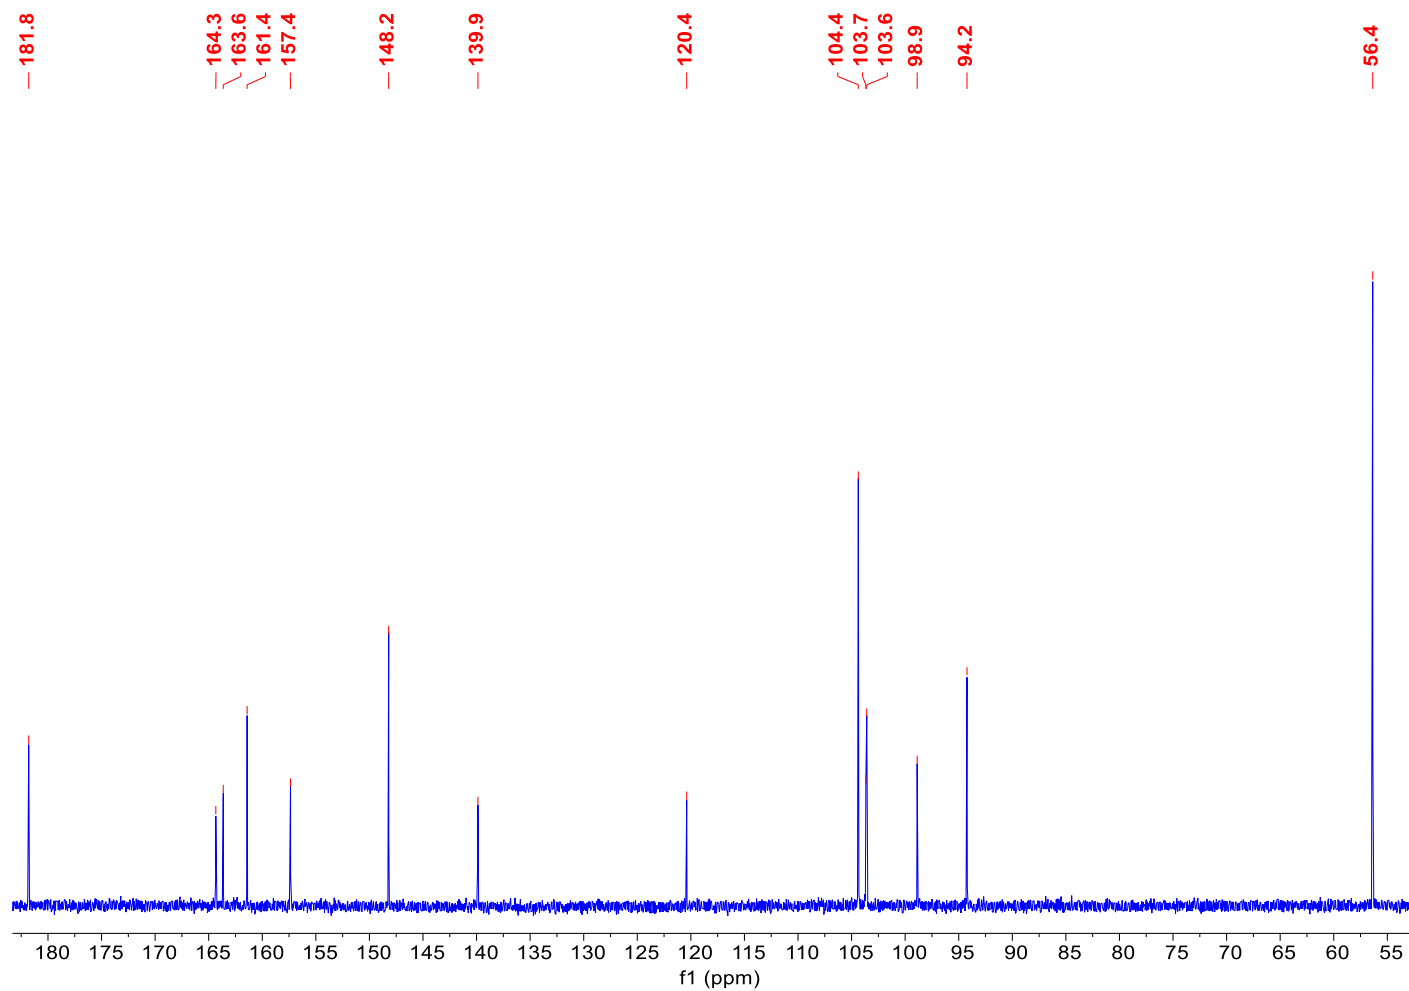

Supplement: s1 [file s1]
